# Supplementary material for: The Chondroprotective Role of TMF in PGE2-Induced Apoptosis Associating with Endoplasmic Reticulum Stress
Source: Hindawi journal article supplement (doi:10.1155/2015/297423), 2015-01-01
Supplement: f1 [file 297423.f1.pdf]

## Supplement

### S1: TMF decreased TM-induced apoptosis ratio of chondrocytes in vitro

To determine the effect of TMF on chondrocytes cell death, 1  $\mu\text{M}$  TM and TMF (5, 10, and 20  $\mu\text{g}/\text{mL}$ ) were added to the cultured medium for 48 h. Cell apoptosis was analyzed by flow cytometry using the FITC-Annexin V/PI double staining. As showed in Figure S1, TM could promote chondrocytes apoptosis, and TMF exhibited chondroprotective activity. In the model group, the chondrocytes apoptosis rates were  $4.38 \pm 0.34\%$  in FITC-Annexin V/PI double staining. In contrast, at the dose of 20  $\mu\text{g}/\text{mL}$  of TMF, they showed almost as moderate as those in the control group.

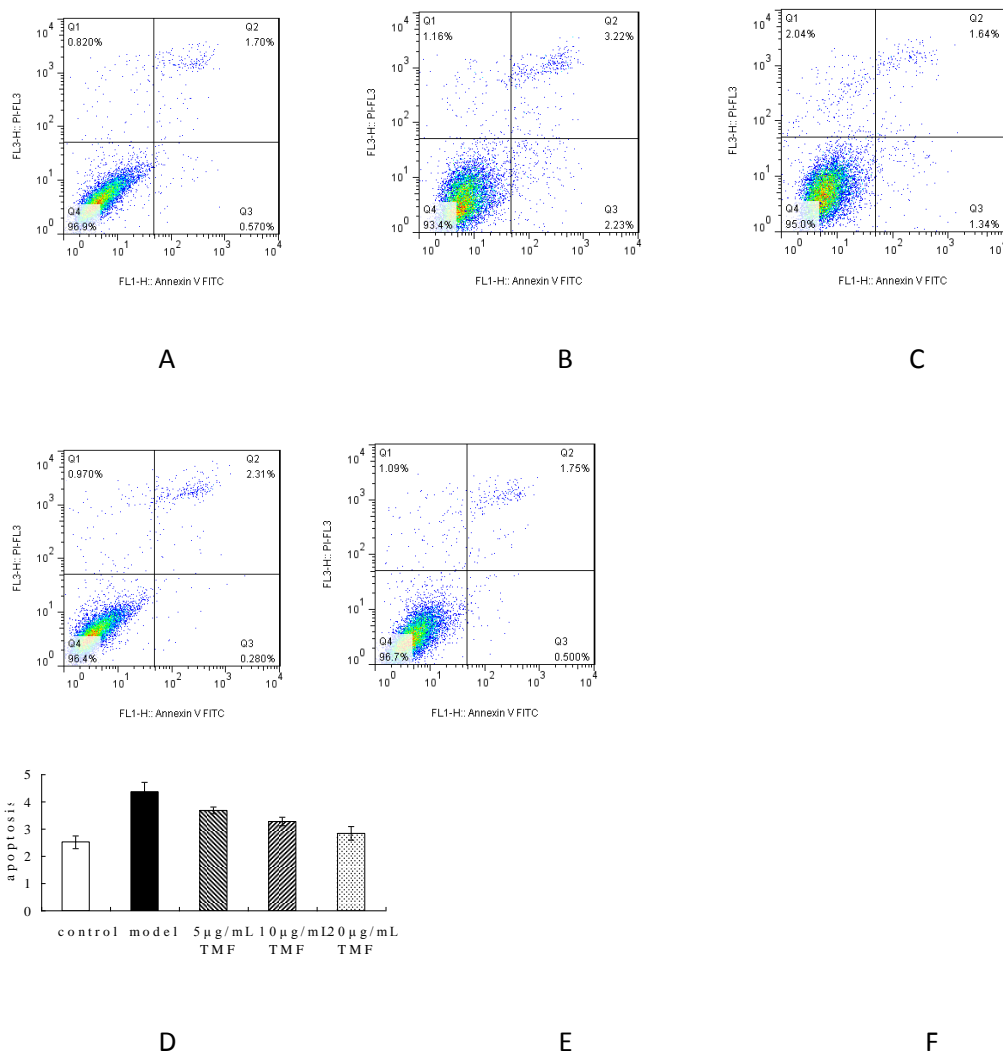

**Figure S1.** TMF inhibited chondrocytes apoptosis induced by 1  $\mu\text{M}$  TM. The healthy chondrocytes were incubated for 48 h.

Chondrocytes in the control group (A) was incubated without adding any medicines. Model group (B) was the healthy chondrocytes incubated with 1  $\mu\text{M}$  TM. Figure C-E were groups incubated with 1  $\mu\text{M}$  TM and 5, 10, and 20  $\mu\text{g}/\text{mL}$  TMF, respectively. Figure F was the summarized data indicating the rate of apoptosis cells, as detected by flow cytometry. Data were presented by mean  $\pm$  standard deviation of 4 replicates. \* $p < 0.05$  as compared with control.
